# Supplementary material for: Comprehensive Genomic Analysis for Identifying FZD6 as a Novel Diagnostic Biomarker for Acute Myeloid Leukemia
Source: Hindawi journal article supplement (doi:10.1155/2022/9130958), 2022-11-18

**A**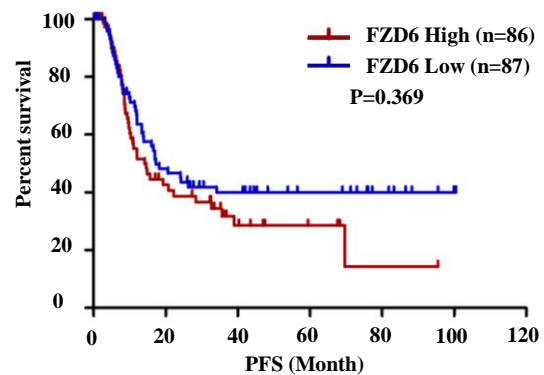**B**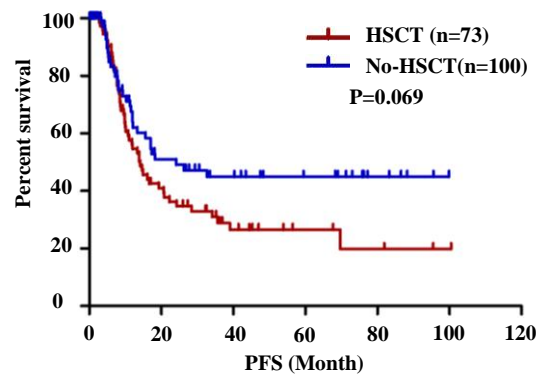**C**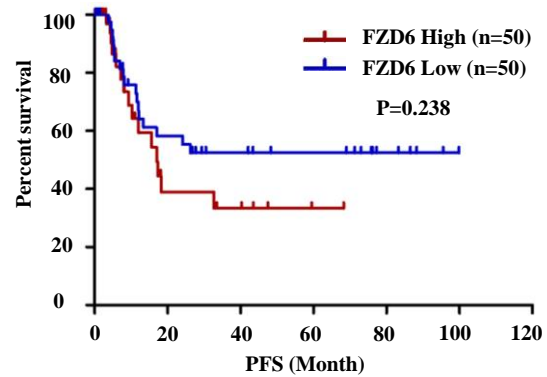**D**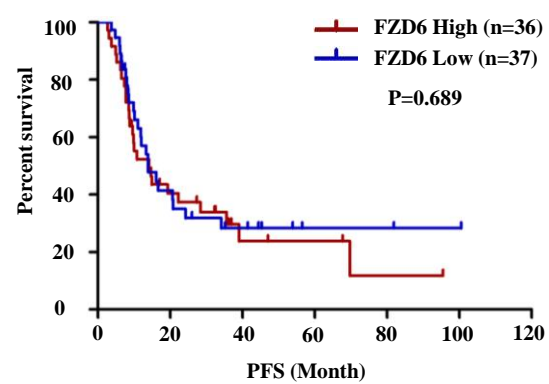

Supplement: f4 [file 9130958.f4.pdf]
