# Supplementary material for: Comprehensive Genomic Analysis for Identifying FZD6 as a Novel Diagnostic Biomarker for Acute Myeloid Leukemia
Source: Hindawi journal article supplement (doi:10.1155/2022/9130958), 2022-11-18

A

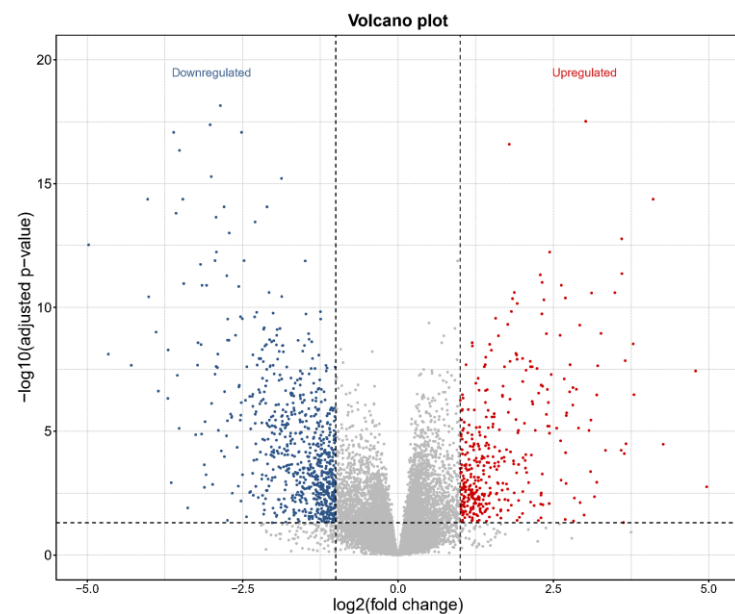

B

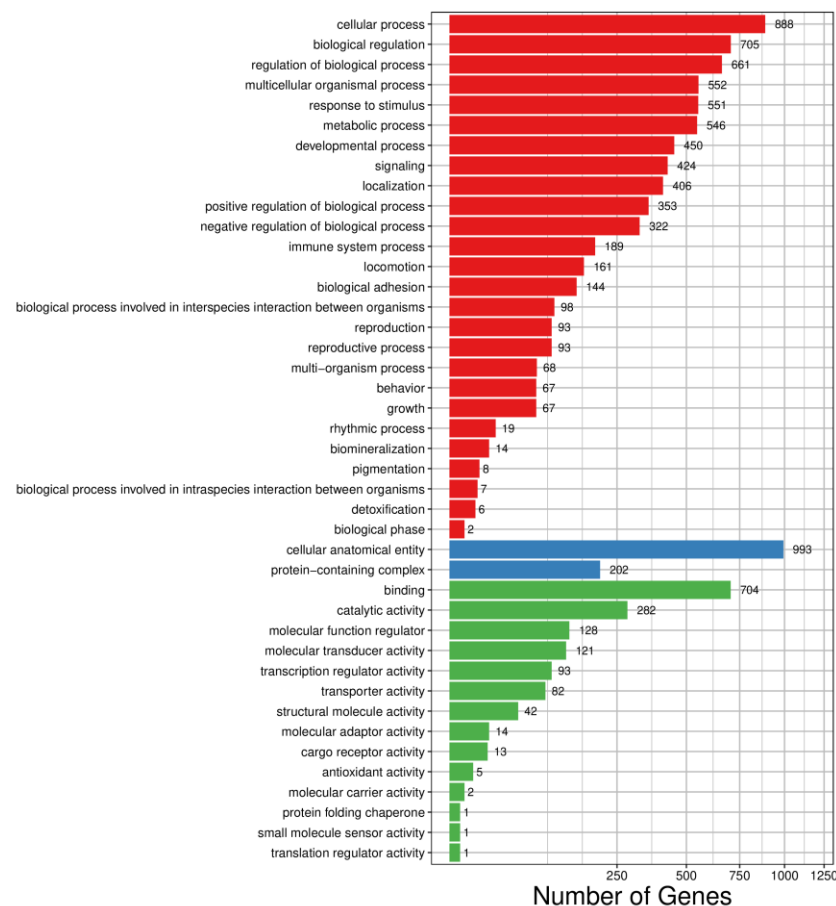

C

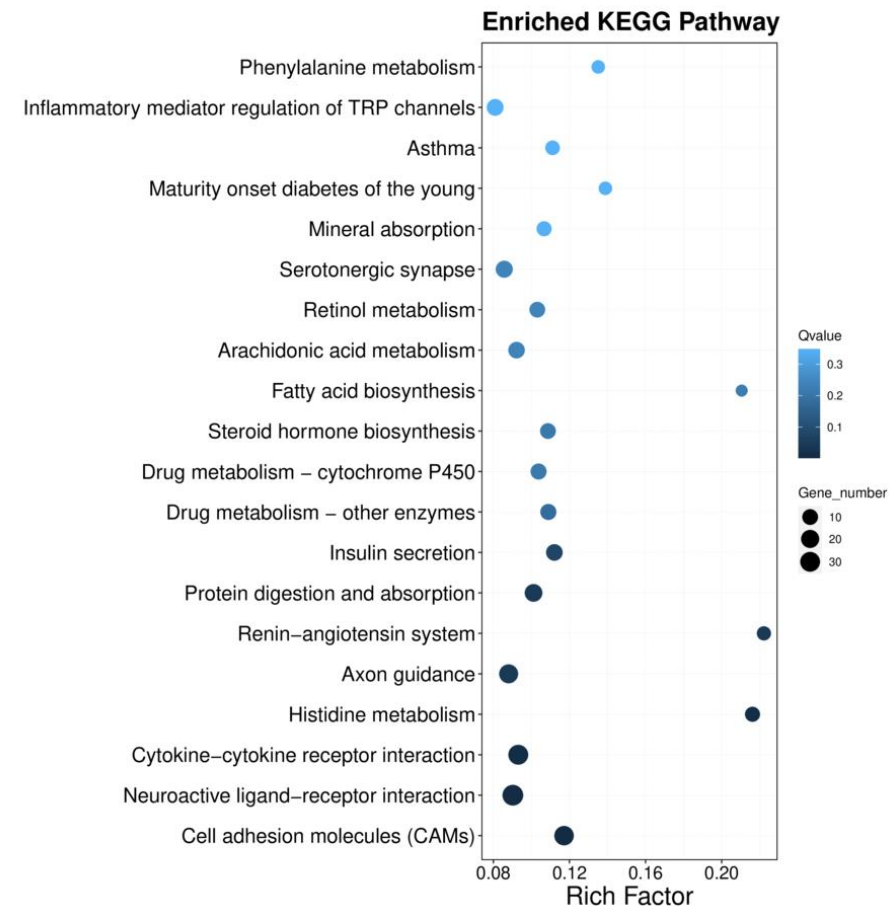

Supplement: f5 [file 9130958.f5.pdf]
